# Supplementary material for: The Centrifugal Differential Mobility Analyser – A new device for determination of two-dimensional property distributions
Source: Copernicus journal article supplement (doi:10.5194/ar-2024-29), 2024-10-25
Supplement: Supplementary file [file ar-2024-29-AC2-supplement.pdf]

430 **Nomenclature**

|     |                                        |                                                      |                  |
|-----|----------------------------------------|------------------------------------------------------|------------------|
|     | $\bar{r}$                              | average of the outer and inner radii                 | –                |
|     | $\bar{x}$                              | mean particle size                                   | m                |
|     | $\beta$                                | ratio of $Q_a$ to $Q_{sh}$                           | –                |
|     | $\eta$                                 | dynamic viscosity                                    | Pas              |
| 435 | $\kappa$                               | ratio of $r_1$ to $r_4$                              | –                |
|     | $\Omega$                               | transfer function                                    | –                |
|     | $\omega$                               | angular speed                                        | 1/s              |
|     | $\Omega_{max}$                         | maximum height of a the transfer function            | –                |
|     | $\sigma$                               | width of a the transfer function                     | –                |
| 440 | $\tau$                                 | particle relaxation time                             | s                |
|     | $\tau^*$                               | nominal particle relaxation time                     | s                |
|     | $\widetilde{\mu}_2, \widetilde{\mu}_1$ | fit parameters for the shift of a Gaussian function  | –                |
|     | $\widetilde{\mu}$                      | shift of a the transfer function                     | –                |
|     | $\widetilde{\tau}$                     | normalized particle relaxation time                  | –                |
| 445 | $\widetilde{Z}$                        | normalized particle mobility                         | –                |
|     | $a, d$                                 | fit parameters for the height of a Gaussian function | –                |
|     | $a_c$                                  | centrifugal acceleration                             | m/s <sup>2</sup> |
|     | $c, e$                                 | fit parameters for the width of a Gaussian function  | –                |
|     | $c_0$                                  | total number concentration                           | #/m <sup>3</sup> |
| 450 | $Cu$                                   | Cunningham slip correction factor                    | –                |
|     | $d_m$                                  | electric mobility equivalent diameter                | m                |
|     | $d_v$                                  | volume equivalent diameter                           | m                |
|     | $d_{ae}$                               | aerodynamic equivalent diameter                      | m                |

|     |           |                                                                        |          |
|-----|-----------|------------------------------------------------------------------------|----------|
|     | $d_{st}$  | stokes equivalent diameter                                             | m        |
| 455 | $E$       | electric field magnitude                                               | V/m      |
|     | $F_c$     | centrifugal force                                                      | N        |
|     | $F_{Dr}$  | drag force                                                             | N        |
|     | $F_{el}$  | electrical force                                                       | N        |
|     | $L$       | length of the CDMA transfer path                                       | m        |
| 460 | $m_P$     | particle mass                                                          | kg       |
|     | $n_1$     | particle number concentration after the first device in a tandem setup | $\#/m^3$ |
|     | $n_2$     | particle number concentration after both devices in a tandem setup     | $\#/m^3$ |
|     | $Q_a$     | aerosol volume flow                                                    | $m^3/s$  |
|     | $Q_P$     | particle charge                                                        | As       |
| 465 | $Q_s$     | sample volume flow                                                     | $m^3/s$  |
|     | $Q_{ex}$  | excess air volume flow                                                 | $m^3/s$  |
|     | $Q_{sh}$  | sheath air volume flow                                                 | $m^3/s$  |
|     | $r_1$     | inner radius                                                           | m        |
|     | $r_2$     | maximum radius at which the particles enter                            | m        |
| 470 | $r_3$     | minimum radius of which the particles are still classified             | m        |
|     | $r_4$     | outer radius                                                           | m        |
|     | $r_{in}$  | actual radius at which the particle enters                             | m        |
|     | $s$       | radial distance                                                        | m        |
|     | $s_{max}$ | maximum radial distance                                                | m        |
| 475 | $T$       | truncation factor                                                      | –        |
|     | $U$       | voltage                                                                | V        |
|     | $u$       | velocity of the air                                                    | m/s      |

|     |          |                                                   |                          |
|-----|----------|---------------------------------------------------|--------------------------|
|     | $w_{Dr}$ | particle drift velocity                           | m/s                      |
|     | $y$      | position of the particle in stream-wise direction | m                        |
| 480 | $Z^*$    | nominal particle mobility                         | $\text{m}^2/(\text{Vs})$ |
|     | $Z_p$    | particle mobility                                 | $\text{m}^2/(\text{Vs})$ |
